# Supplementary material for: Ultra-sensitive and selective Hg2+ chemosensors derived from substituted 8-hydroxyquinoline analogues
Source: Royal Society of Chemistry journal article supplement (doi:10.1039/c3nj01308a), 2013-12-16
Supplement: c3nj01308a.pdf [file c3nj01308a.pdf]

# Ultra-Sensitive and Selective Hg<sup>2+</sup> Chemosensors Derived from Substituted 8-Hydroxyquinoline Analogues

## Supporting Information

Jérémy Bell, Issa Samb, Patrick Y. Toullec, Olivier Mongin, Mireille Blanchard-Desce, \* Véronique Michelet\* and Isabelle Leray\*

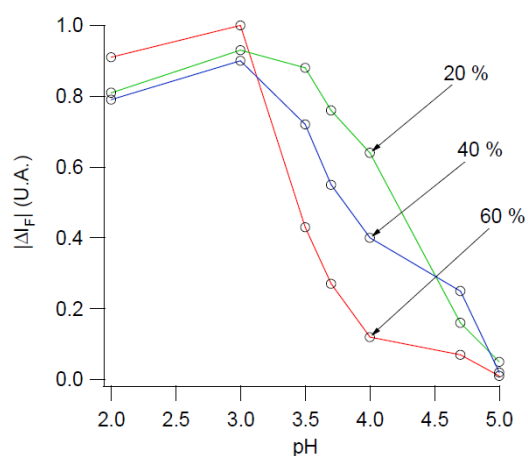

Response of the probe **4** after addition of 1 equiv. of mercury in CH<sub>3</sub>CN/H<sub>2</sub>O with different proportions of water (20%, 40% and 60%) and different pH ( $C_{\text{probe}} = 13 \mu\text{M}$ ,  $\lambda_{\text{exc}} = 420 \text{ nm}$ ,  $\lambda_{\text{exc}} = 565 \text{ nm}$ ).
